# Supplementary material for: Sustained Subconjunctival Delivery of Infliximab Protects the Cornea and Retina Following Alkali Burn to the Eye
Source: PubMed Central journal article supplement — Invest Ophthalmol Vis Sci. 2017 Jan;58(1):96–105. doi: 10.1167/iovs.16-20339 (PMC5231904; doi:10.1167/iovs.16-20339), 2017-01

Supplementary Figure 1. Immunolocalization of infliximab in various ocular tissue after 3 months of DDS implantation in burned eyes.

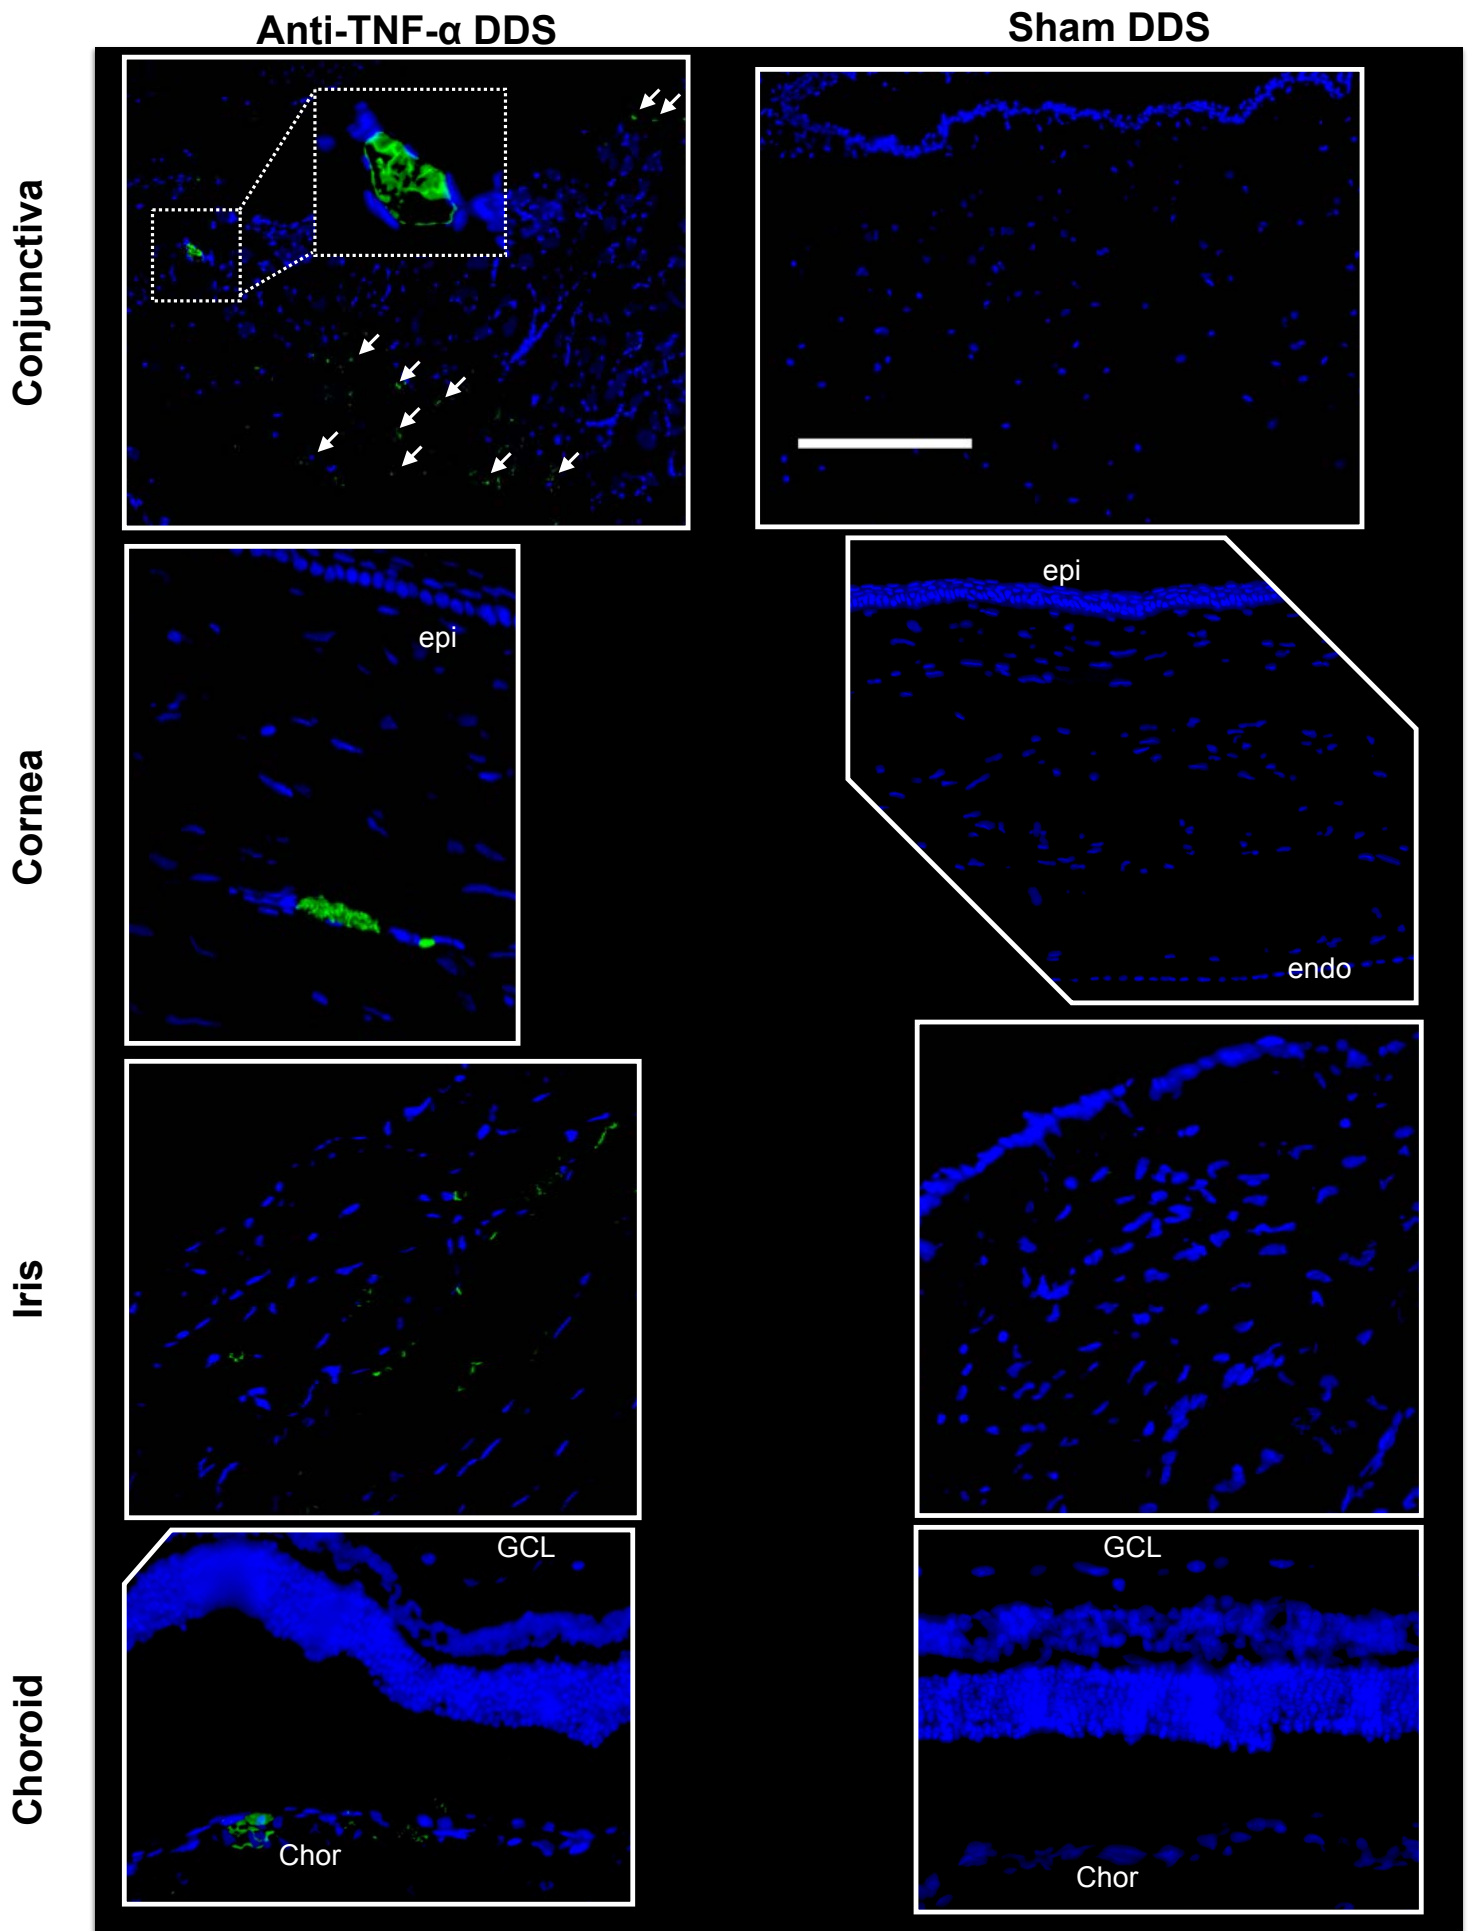

Supplement: iovs-57-15-36_s01.pdf [file iovs-57-15-36_s01.pdf]
