# Supplementary material for: Sustained Subconjunctival Delivery of Infliximab Protects the Cornea and Retina Following Alkali Burn to the Eye
Source: PubMed Central journal article supplement — Invest Ophthalmol Vis Sci. 2017 Jan;58(1):96–105. doi: 10.1167/iovs.16-20339 (PMC5231904; doi:10.1167/iovs.16-20339), 2017-01
Supplement: iovs-57-15-36_s03.pdf [file iovs-57-15-36_s03.pdf]

**Supplementary Figure 1. Immunolocalization of infliximab in various ocular tissue after 3 months of DDS implantation in burned eyes.**

Eyes with anti-TNF- $\alpha$  DDS showed presence of infliximab antibody around and within small vessels in the conjunctiva, cornea, iris, and choroid 3 months after implantation of the DDS. Green = Anti-human anti-IgG antibody. Blue = DAPI. Legend = 250 $\mu$ m.

**Supplementary Figure 2. Increased leukocytes infiltration and ganglion cell loss in the rabbit with early extrusion of the anti-TNF- $\alpha$  DDS.**

The therapeutic effect of sustained anti-TNF- $\alpha$  delivery was observed in one rabbit with early DDS extrusion (42days) due to loose conjunctival sutures. This rabbit exhibited increased infiltration of leukocytes in the cornea and increased loss of RGCs as compared to the rabbits that retained the anti-TNF- $\alpha$  DDS for 3 months.
